# Supplementary material
Source: PubMed Central journal article supplement (PMC3887969)
Supplement: molcell-36-6-518-4-supplementary.pdf [file molcell-36-6-518-4-supplementary.pdf]

Supplemental Figure 1. Loop mutations partially rescue defective let-7 biogenesis. Primer extension analyses to determine the 5' ends of pre-let-7 (top) and mature let-7 (bottom) from wild-type cel-let-7 and loop mutants.

Supplemental Figure 2. Loop mutations or SNPs have almost no effect on primary-miRNA expression. (A) & (B) Pri-let-7 produced from wild-type cel-let-7 and loop mutants were assessed by a pri-miRNA qPCR assay. (C) Pri-miRNA produced from wild-type and SNP mutants were determined by a pri-miRNA qPCR assay. Representative results of three independent transfections are shown.

Supplemental Figure 3. Loop SNPs in human miRNA have almost no effect on mature miRNA production. Mature miRNA produced from wild-type and SNP mutants were determined by a miRNA qPCR assay. Representative results of three independent transfections are shown.

# Supplement Fig. 1

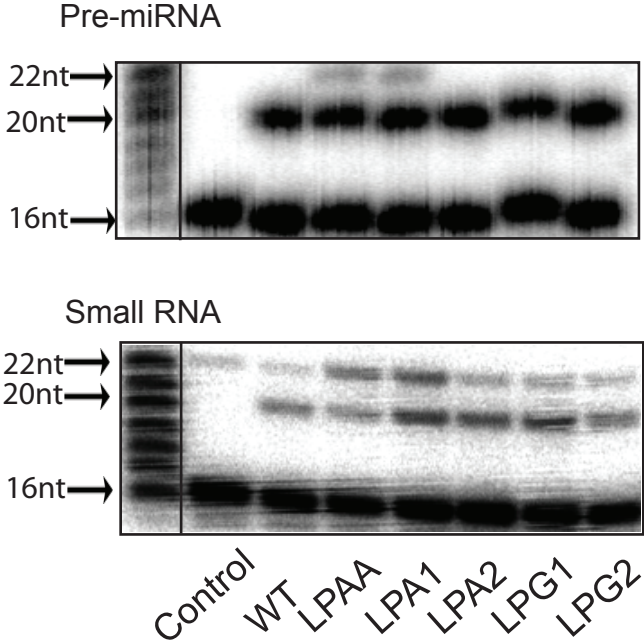

Supplement Fig. 2

A

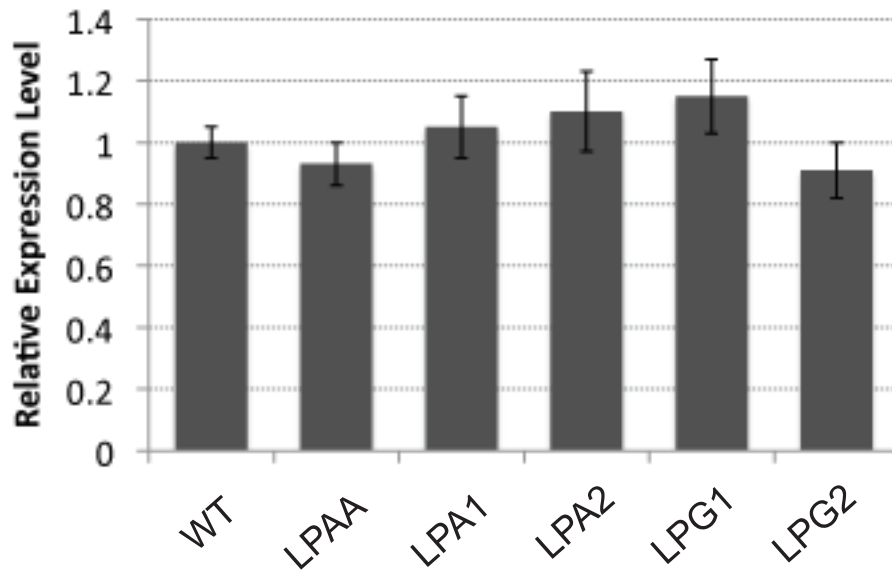

B

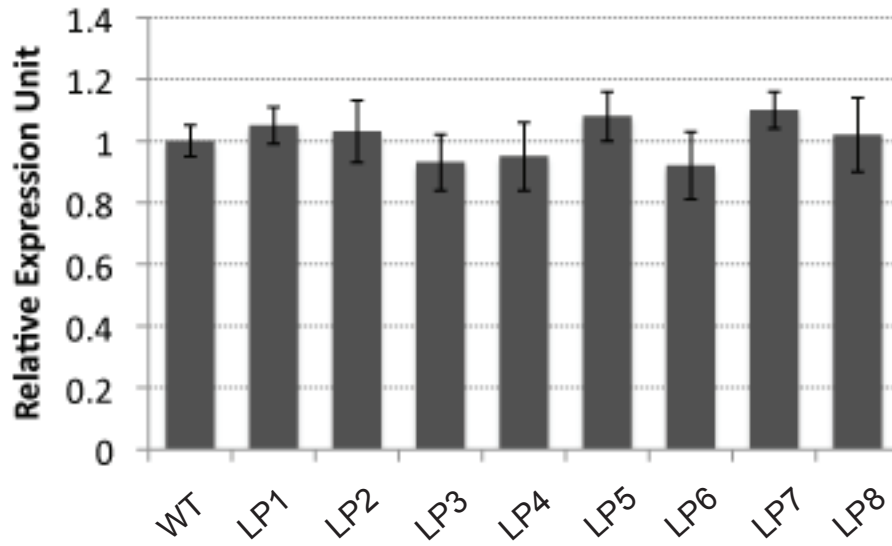

C

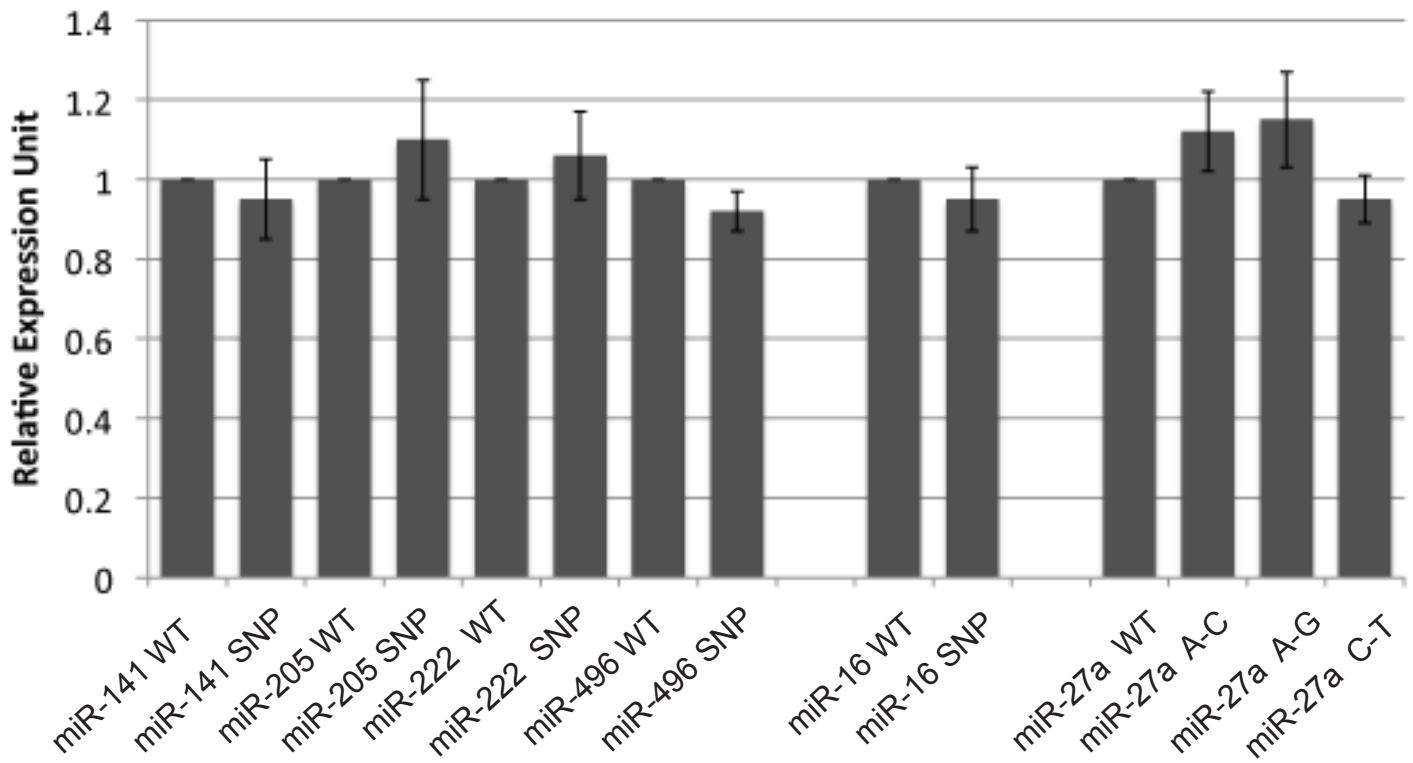

Supplement Fig. 3

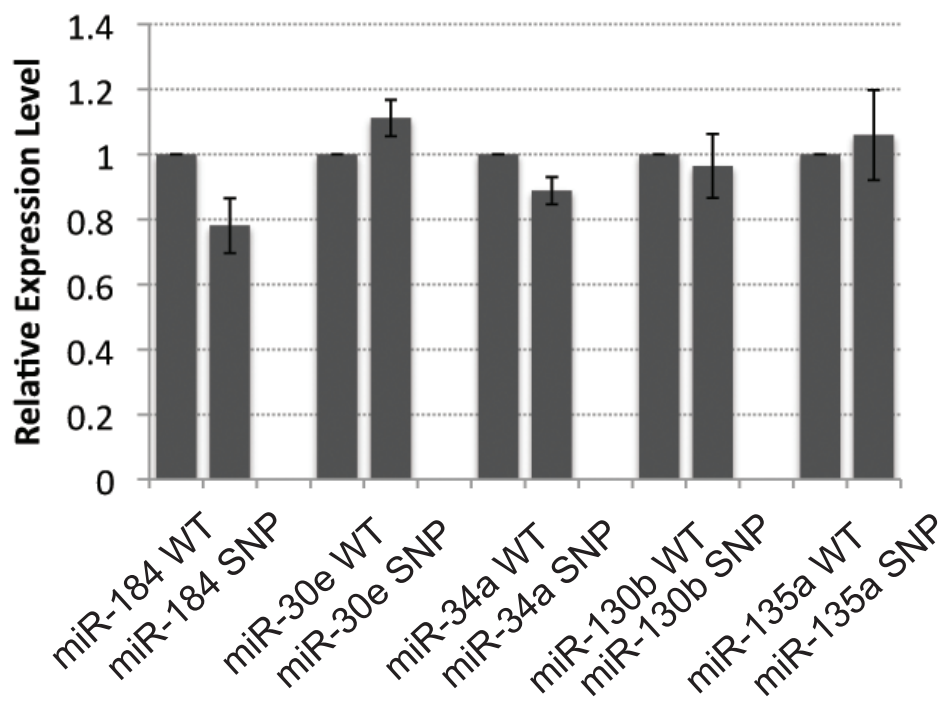

# Supplement Table 1

## Oligo sequence for primer extension analyses

| Primer/ladder | Oligo sequence(5'->3')    |
|---------------|---------------------------|
| Primer        | AACTATACAACCTACT          |
| 16nt (ladder) | AACTATACAACCTACT          |
| 17nt (ladder) | AACTATACAACCTACTA         |
| 18nt (ladder) | AACTATACAACCTACTAC        |
| 19nt (ladder) | AACTATACAACCTACTACC       |
| 20nt (ladder) | AACTATACAACCTACTACCT *    |
| 21nt (ladder) | AACTATACAACCTACTACCTC     |
| 22nt (ladder) | AACTATACAACCTACTACCTCA ** |

\* Truncated product \*\* Canonical product

## Supplement Table 2

A list of qPCR primers for Pri-miRNA

| miRNA        | Forward Primer          | Reverse Primer         |
|--------------|-------------------------|------------------------|
| cel-let-7    | GTGGATCCGGTGAGGTAGTAG   | AGAAAGTTGTGAGAGCAAGACG |
| hsa-mir-16-1 | GCTCTTATGATAGCAATGTCAGC | CAACCTTACTTCAGCAGCACA  |
| hsa-mir-27a  | TTCACAGTGGCTAAGTTCCG    | TGTGTTTCAGCTCAGTAGGCA  |
| hsa-mir-141  | TGGGTCCATCTTCCAGTACA    | AGTCCTCCATGGTCTTCAGG   |
| hsa-mir-205  | TCCATGTGCTTCTCTTGCC     | CTCATGGTTGTCAGCTCCAT   |
| hsa-mir-222  | ACCCTCAATGGCTCAGTAGC    | CAGGACACTGAAGCAGAAGC   |
| hsa-mir-496  | TGCAAGTAAGGGATGGAGTG    | ACGGACGGGATACTGAGAGT   |

# Supplement Table 3

A summary of single nucleotide polymorphism(SNP) in pre-miRNA

| miRNA          | Loop sequence(SNP)      | SNPID       |
|----------------|-------------------------|-------------|
| hsa-mir- 96    | GTGTCTCTCC(T)GCTCT      | rs73159662  |
| hsa-mir-146b   | GT(G)GAGCTCTAGCAA       | rs117717575 |
| hsa-mir-181b-2 | TTG(T)AGTCTGAATCA       | rs78086449  |
| hsa-mir-183    | G(A)TGAACAGTCTCAGTC     | rs41281222  |
| hsa-mir-320d-1 | CCAAAGT(C)TGA           | rs74826059  |
| hsa-mir- 411   | T(C)CTG                 | rs111906529 |
| hsa-mir-496    | TTA(C)TTTAT             | rs79307187  |
| hsa-mir-516b-1 | C(G)TGTTTTGTGAAAGAAAAG  | rs79235448  |
| hsa-mir-518d   | TTGTCTGAAAGAAAC(T)      | rs116220629 |
| hsa-mir-550b-1 | CTA(G)TCTTACAACAACAT    | rs71528599  |
| hsa-mir-559    | TTACTTTT(C)TGGTAAATACAG | rs114803590 |
| hsa-mir-559    | TTACTTTTGGTAAATAC(T)AG  | rs58450758  |
| hsa-mir-581    | CTTTTAG(A)AAAATTT       | rs788517    |
| hsa-mir-596    | AAC(T)CTGCCT            | rs111606748 |
| hsa-mir-612    | AGCACTAGCAG(A)          | rs12803915  |
| hsa-mir-656    | TTC(T)TATATG            | rs58834075  |
| hsa-mir-891a   | TTC(T)AGTAAAATAC        | rs5965990   |
| hsa-mir-939    | GCC(T)GGGGC             | rs112257111 |
| hsa-mir-941-4  | CAC(T)GGAAGAG           | rs112205797 |
| hsa-mir-942    | GTACTCACAGCCC(A)CTC     | rs115775392 |
